# Supplementary material
Source: publisher figshare collection journal article supplement (https://frontiersin.figshare.com/ndownloader/files/12461303)
Supplement: Supplementary file [file 12461303]

**Table S7** | Candidate selective sweep regions detected in Sri Lankan domestic chicken population using  $H_p$ . The **Ggal** is the reference genome annotation for the *Galgal* version 4 or 5, **Ln** is length in kilobase, **nWd** is the number of windows analysed for the sweep region

| Chr | Ggal4_start | Ggal4_stop | Ln | nWd | Total SNP | mean ( $H_p$ )   | mean $Z(H_p)$     | Ggal4_gene                 | Ggal5_start | Ggal5_stop | Ggal5_gene          |
|-----|-------------|------------|----|-----|-----------|------------------|-------------------|----------------------------|-------------|------------|---------------------|
| 1   | 8520000     | 8540000    | 20 | 1   | 274       | 0.16             | -4.03             | <i>SEMA3A</i>              | 8665357     | 8685324    | -                   |
| 1   | 18110000    | 18130000   | 20 | 1   | 145       | 0.16             | -4.07             | -                          | 18311759    | 18331760   | -                   |
| 1   | 25290000    | 25350000   | 60 | 5   | 216       | $0.14 \pm 0.01$  | $-4.51 \pm 0.262$ | <i>TFEC</i>                | 25351496    | 25412595   | -                   |
| 1   | 25400000    | 25430000   | 30 | 2   | 243       | 0.15             | $-4.35 \pm 0.008$ | -                          | 25462594    | 25492468   | -                   |
| 1   | 25450000    | 25470000   | 20 | 1   | 227       | 0.15             | -4.28             | -                          | 25512469    | 25532471   | -                   |
| 1   | 25580000    | 25600000   | 20 | 1   | 321       | 0.14             | -4.53             | -                          | 25642536    | 25662537   | -                   |
| 1   | 26450000    | 26470000   | 20 | 1   | 270       | 0.16             | -4.04             | -                          | 26512591    | 26532597   | -                   |
| 1   | 27840000    | 27870000   | 30 | 2   | 319       | $0.14 \pm 0.005$ | $-4.55 \pm 0.131$ | -                          | 27917075    | 27947075   | -                   |
| 1   | 32430000    | 32450000   | 20 | 1   | 186       | 0.12             | -4.95             | -                          | 32471039    | 32491038   | -                   |
| 1   | 42950000    | 42980000   | 30 | 2   | 146       | $0.14 \pm 0.02$  | $-4.55 \pm 0.518$ | -                          | 43067034    | 43097039   | -                   |
| 1   | 43060000    | 43110000   | 50 | 4   | 84        | $0.09 \pm 0.025$ | $-5.96 \pm 0.64$  | -                          | 43176831    | 43226829   | -                   |
| 1   | 43840000    | 43860000   | 20 | 1   | 103       | 0.15             | -4.32             | <i>KERA</i>                | 43966513    | 43986513   | <i>KERA</i>         |
| 1   | 75840000    | 75880000   | 40 | 3   | 108       | $0.11 \pm 0.036$ | $-5.34 \pm 0.932$ | <i>OVSTL, gga-mir-6606</i> | 76415999    | 76450241   | <i>gga-mir-6606</i> |
| 1   | 79430000    | 79450000   | 20 | 1   | 242       | 0.14             | -4.43             | -                          | 79990564    | 80010564   | -                   |
| 1   | 92710000    | 92730000   | 20 | 1   | 180       | 0.15             | -4.19             | <i>CADM2</i>               | 93354612    | 93374612   | <i>CADM2</i>        |
| 1   | 103010000   | 103040000  | 30 | 2   | 376       | $0.15 \pm 0.003$ | $-4.24 \pm 0.069$ | -                          | 103682296   | 103712296  | -                   |
| 1   | 110720000   | 110750000  | 30 | 2   | 161       | $0.13 \pm 0.027$ | $-4.83 \pm 0.687$ | -                          | 111379827   | 111401672  | -                   |
| 1   | 118020000   | 118040000  | 20 | 1   | 292       | 0.13             | -4.8              | -                          | 118579504   | 118599504  | -                   |
| 1   | 140850000   | 140870000  | 20 | 1   | 119       | 0.16             | -4.05             | -                          | 141580644   | 141599898  | -                   |
| 1   | 146980000   | 147000000  | 20 | 1   | 263       | 0.15             | -4.23             | <i>GPC5</i>                | 147749465   | 147769463  | <i>GPC5</i>         |
| 1   | 147930000   | 147950000  | 20 | 1   | 99        | 0.16             | -4.05             | -                          | 148698337   | 148718340  | -                   |
| 1   | 149380000   | 149410000  | 30 | 2   | 96        | $0.15 \pm 0.006$ | $-4.39 \pm 0.148$ | -                          | 150154135   | 150184552  | -                   |
| 1   | 158080000   | 158100000  | 20 | 1   | 85        | 0.15             | -4.17             | -                          | 158909666   | 158929683  | -                   |
| 1   | 189930000   | 189990000  | 60 | 5   | 181       | $0.15 \pm 0.016$ | $-4.32 \pm 0.415$ | -                          | 190796652   | 190856658  | -                   |
| 1   | 190070000   | 190110000  | 40 | 3   | 199       | $0.1 \pm 0.014$  | $-5.51 \pm 0.364$ | -                          | 190937229   | 190977200  | -                   |
| 1   | 190200000   | 190240000  | 40 | 3   | 202       | $0.14 \pm 0.018$ | $-4.56 \pm 0.463$ | -                          | 191067211   | 191107508  | -                   |

|   |           |           |     |    |     |                  |                   |                               |           |           |                     |
|---|-----------|-----------|-----|----|-----|------------------|-------------------|-------------------------------|-----------|-----------|---------------------|
| 2 | 2640000   | 2660000   | 20  | 1  | 246 | 0.14             | -4.45             | -                             | 2678814   | 2698812   | -                   |
| 2 | 11890000  | 11910000  | 20  | 1  | 116 | 0.14             | -4.52             | -                             | 11964104  | 11984107  | -                   |
| 2 | 24350000  | 24380000  | 30  | 2  | 355 | $0.15 \pm 0.007$ | $-4.27 \pm 0.188$ | -                             | 24249156  | 24279167  | -                   |
| 2 | 27990000  | 28010000  | 20  | 1  | 109 | 0.14             | -4.53             | <i>AGMO</i>                   | 27911972  | 27931970  | <i>AGMO</i>         |
| 2 | 28260000  | 28290000  | 30  | 2  | 102 | $0.11 \pm 0.028$ | $-5.23 \pm 0.722$ | <i>5S_rRNA</i>                | 28181919  | 28211919  | <i>5S_rRNA</i>      |
| 2 | 36010000  | 36040000  | 30  | 2  | 240 | $0.14 \pm 0.014$ | $-4.48 \pm 0.365$ | <i>KCNH8</i>                  | 35572340  | 35602326  | <i>KCNH8</i>        |
| 2 | 36170000  | 36190000  | 20  | 1  | 281 | 0.13             | -4.73             | -                             | 35732316  | 35752317  | <i>KCNH8</i>        |
| 2 | 36200000  | 36220000  | 20  | 1  | 273 | 0.16             | -4.06             | -                             | 35762317  | 35782317  | -                   |
| 2 | 52310000  | 52330000  | 20  | 1  | 83  | 0.15             | -4.28             | <i>VOPPI</i>                  | 51887766  | 51905922  | <i>VOPPI</i>        |
| 2 | 52410000  | 52430000  | 20  | 1  | 67  | 0.14             | -4.66             | <i>EGFR</i>                   | 51985932  | 52005932  | <i>EGFR</i>         |
| 2 | 52500000  | 52540000  | 40  | 3  | 82  | $0.15 \pm 0.01$  | $-4.18 \pm 0.252$ | <i>EGFR</i>                   | 52075837  | 52115805  | <i>EGFR</i>         |
| 2 | 52610000  | 52630000  | 20  | 1  | 116 | 0.15             | -4.28             | -                             | 52186033  | 52206034  | -                   |
| 2 | 52650000  | 52670000  | 20  | 1  | 70  | 0.16             | -4.08             | -                             | 52226035  | 52245967  | -                   |
| 2 | 52690000  | 52720000  | 30  | 2  | 103 | $0.15 \pm 0.009$ | $-4.39 \pm 0.245$ | <i>SEC61G</i>                 | 52265804  | 52295807  | <i>SEC61G</i>       |
| 2 | 52870000  | 52890000  | 20  | 1  | 76  | 0.16             | -4.03             | <i>TPK1</i>                   | 52982606  | 53002606  | <i>TPK1</i>         |
| 2 | 52980000  | 53050000  | 70  | 6  | 148 | $0.15 \pm 0.01$  | $-4.38 \pm 0.252$ | <i>TPK1</i>                   | 53092604  | 53162921  | <i>TPK1</i>         |
| 2 | 53090000  | 53180000  | 90  | 8  | 116 | $0.16 \pm 0.012$ | $-4.15 \pm 0.323$ | <i>TPK1</i>                   | 53212192  | 53292136  | -                   |
| 2 | 54720000  | 54740000  | 20  | 1  | 244 | 0.16             | -4.16             | -                             | 54807792  | 54827790  | -                   |
| 2 | 78310000  | 78340000  | 30  | 2  | 168 | $0.12 \pm 0.01$  | $-5.2 \pm 0.259$  | -                             | 78554635  | 78584572  | -                   |
| 2 | 81900000  | 81920000  | 20  | 1  | 143 | 0.15             | -4.23             | -                             | 82140679  | 82160679  | -                   |
| 2 | 81950000  | 82240000  | 290 | 27 | 125 | $0.14 \pm 0.018$ | $-4.65 \pm 0.454$ | -                             | 82190953  | 82481139  | -                   |
| 2 | 86710000  | 86730000  | 20  | 1  | 113 | 0.15             | -4.33             | -                             | 86985708  | 87005707  | -                   |
| 2 | 86790000  | 86820000  | 30  | 2  | 122 | $0.15 \pm 0.006$ | $-4.29 \pm 0.166$ | -                             | 87066280  | 87096280  | -                   |
| 2 | 87440000  | 87460000  | 20  | 1  | 86  | 0.16             | -4.08             | -                             | 87730072  | 87750073  | -                   |
| 2 | 91940000  | 91960000  | 20  | 1  | 306 | 0.15             | -4.2              | <i>CYB5A</i>                  | 92245735  | 92265735  | <i>CYB5A</i>        |
| 2 | 95760000  | 95780000  | 20  | 1  | 108 | 0.16             | -4.01             | -                             | 96102435  | 96122454  | -                   |
| 2 | 108940000 | 108980000 | 40  | 3  | 199 | $0.13 \pm 0.01$  | $-4.93 \pm 0.255$ | -                             | 109577665 | 109617666 | -                   |
| 2 | 118490000 | 118520000 | 30  | 2  | 126 | $0.15 \pm 0.019$ | $-4.35 \pm 0.482$ | -                             | 119213580 | 119243580 | -                   |
| 2 | 140970000 | 141010000 | 40  | 3  | 199 | $0.15 \pm 0.01$  | $-4.32 \pm 0.268$ | <i>HHLA1,</i><br><i>KCNQ3</i> | 141501204 | 141541206 | <i>HHLA1, KCNQ3</i> |
| 2 | 146620000 | 146650000 | 30  | 2  | 175 | $0.12 \pm 0.002$ | $-5.12 \pm 0.061$ | -                             | 147154279 | 147184251 | -                   |

|   |           |           |     |    |     |                  |                   |                      |           |           |                     |
|---|-----------|-----------|-----|----|-----|------------------|-------------------|----------------------|-----------|-----------|---------------------|
| 2 | 146720000 | 146740000 | 20  | 1  | 199 | 0.13             | -4.92             | -                    | 147254792 | 147274793 | -                   |
| 3 | 1120000   | 1210000   | 90  | 8  | 111 | $0.14 \pm 0.017$ | $-4.59 \pm 0.445$ | -                    | 1146438   | 1236442   | -                   |
| 3 | 23050000  | 23080000  | 30  | 2  | 166 | $0.13 \pm 0.017$ | $-4.87 \pm 0.445$ | <i>EML4</i>          | 23765628  | 23795628  | <i>EML4</i>         |
| 3 | 69020000  | 69060000  | 40  | 3  | 159 | $0.15 \pm 0.008$ | $-4.23 \pm 0.2$   | -                    | 69835999  | 69875998  | -                   |
| 3 | 69250000  | 69270000  | 20  | 1  | 155 | 0.16             | -4.1              | -                    | 70066048  | 70086052  | -                   |
| 3 | 69370000  | 69390000  | 20  | 1  | 161 | 0.16             | -4                | -                    | 70186196  | 70206297  | -                   |
| 3 | 77550000  | 77570000  | 20  | 1  | 257 | 0.15             | -4.17             | -                    | 78420044  | 78439926  | -                   |
| 3 | 81600000  | 81630000  | 30  | 2  | 392 | $0.14 \pm 0.007$ | $-4.49 \pm 0.178$ | <i>RIMS1</i>         | 82474657  | 82504658  | <i>RIMS1</i>        |
| 3 | 99070000  | 99100000  | 30  | 2  | 202 | $0.15 \pm 0.003$ | $-4.29 \pm 0.09$  | -                    | 99956352  | 99986352  | -                   |
| 3 | 110160000 | 110290000 | 130 | 12 | 263 | $0.14 \pm 0.006$ | $-4.45 \pm 0.162$ | <i>EVA1A</i>         | 111008970 | 111138863 | -                   |
| 4 | 25240000  | 25260000  | 20  | 1  | 196 | 0.14             | -4.47             | -                    | 25981856  | 26001851  | -                   |
| 4 | 26410000  | 26430000  | 20  | 1  | 253 | 0.15             | -4.2              | -                    | 27150530  | 27174313  | -                   |
| 4 | 27860000  | 27910000  | 50  | 4  | 186 | $0.16 \pm 0.013$ | $-4.13 \pm 0.341$ | -                    | 28621318  | 28671317  | -                   |
| 4 | 32410000  | 32440000  | 30  | 2  | 250 | $0.13 \pm 0.016$ | $-4.79 \pm 0.409$ | <i>LRBA</i>          | 33217876  | 33247878  | <i>LRBA</i>         |
| 4 | 38590000  | 38640000  | 50  | 4  | 247 | $0.1 \pm 0.034$  | $-5.52 \pm 0.874$ | <i>TACR3</i>         | 39419744  | 39469745  | <i>TACR3</i>        |
| 4 | 40630000  | 40650000  | 20  | 1  | 92  | 0.16             | -4.15             | -                    | 41472219  | 41492219  | -                   |
| 4 | 56900000  | 56920000  | 20  | 1  | 224 | 0.14             | -4.59             | -                    | 57663311  | 57683312  | -                   |
| 4 | 61190000  | 61230000  | 40  | 3  | 224 | $0.16 \pm 0.013$ | $-4 \pm 0.332$    | <i>RP11-215A19.2</i> | 61984820  | 62024820  | <i>MTNR1A</i>       |
| 4 | 61750000  | 61770000  | 20  | 1  | 218 | 0.14             | -4.59             | -                    | 62544568  | 62564571  | -                   |
| 4 | 72190000  | 72210000  | 20  | 1  | 314 | 0.15             | -4.33             | -                    | 73067668  | 73087708  | -                   |
| 4 | 77080000  | 77100000  | 20  | 1  | 263 | 0.16             | -4.14             | <i>RAB28</i>         | 78068132  | 78088132  | <i>RAB28</i>        |
| 5 | 3800000   | 3840000   | 40  | 3  | 64  | $0.16 \pm 0.003$ | $-4.05 \pm 0.082$ | -                    | 3758345   | 3798346   | -                   |
| 5 | 4240000   | 4260000   | 20  | 1  | 84  | 0.14             | -4.51             | -                    | 4201902   | 4221909   | -                   |
| 5 | 21670000  | 21890000  | 220 | 19 | 71  | $0.11 \pm 0.033$ | $-5.4 \pm 0.866$  | -                    | 22371859  | 22591888  | -                   |
| 5 | 21980000  | 22010000  | 30  | 2  | 202 | $0.13 \pm 0.009$ | $-4.69 \pm 0.237$ | -                    | 22682551  | 22711752  | -                   |
| 5 | 30360000  | 30400000  | 40  | 3  | 105 | $0.15 \pm 0.009$ | $-4.34 \pm 0.245$ | -                    | 31096727  | 31136725  | -                   |
| 5 | 39870000  | 39890000  | 20  | 1  | 164 | 0.15             | -4.33             | -                    | 40638743  | 40658743  | -                   |
| 5 | 40060000  | 40110000  | 50  | 4  | 187 | $0.07 \pm 0.063$ | $-6.32 \pm 1.634$ | <i>TSHR, GTF2A1</i>  | 40828747  | 40878736  | <i>TSHR, GTF2A1</i> |
| 5 | 40880000  | 40910000  | 30  | 2  | 190 | $0.13 \pm 0.043$ | $-4.82 \pm 1.111$ | -                    | 41648280  | 41678280  | -                   |

|    |          |          |    |   |     |                  |                   |                                                 |          |          |                                       |
|----|----------|----------|----|---|-----|------------------|-------------------|-------------------------------------------------|----------|----------|---------------------------------------|
| 5  | 41100000 | 41160000 | 60 | 5 | 115 | $0.13 \pm 0.033$ | $-4.89 \pm 0.862$ | -                                               | 41868267 | 41928265 | -                                     |
| 5  | 46470000 | 46490000 | 20 | 1 | 110 | 0.16             | -4.12             | -                                               | 47284217 | 47304374 | -                                     |
| 6  | 8780000  | 8800000  | 20 | 1 | 96  | 0.15             | -4.26             | <i>BKJ</i>                                      | 9283122  | 9294493  | <i>BKJ</i>                            |
| 6  | 13310000 | 13330000 | 20 | 1 | 67  | 0.15             | -4.28             | <i>KCNMA1</i>                                   | 13744753 | 13764764 | <i>KCNMA1</i>                         |
| 6  | 17860000 | 17950000 | 90 | 8 | 214 | $0.15 \pm 0.008$ | $-4.18 \pm 0.197$ | <i>ARHGAP22</i>                                 | 18316795 | 18406698 | -                                     |
| 6  | 18020000 | 18040000 | 20 | 1 | 257 | 0.16             | -4.14             | <i>WDFY4</i>                                    | 18476698 | 18496698 | -                                     |
| 7  | 7890000  | 7930000  | 40 | 3 | 121 | $0.14 \pm 0.015$ | $-4.55 \pm 0.388$ | -                                               | 8399045  | 8439044  | -                                     |
| 7  | 8070000  | 8100000  | 30 | 2 | 109 | $0.14 \pm 0.024$ | $-4.6 \pm 0.629$  | -                                               | 8578942  | 8608945  | -                                     |
| 7  | 14810000 | 14830000 | 20 | 1 | 58  | 0.16             | -4.17             | <i>TTN</i>                                      | 15373407 | 15393407 | -                                     |
| 7  | 36140000 | 36210000 | 70 | 6 | 72  | $0.13 \pm 0.018$ | $-4.86 \pm 0.462$ | <i>BAZ2B,</i><br><i>MARCH7,</i><br><i>NAA20</i> | 36830252 | 36900268 | <i>NAA20, BAZ2B,</i><br><i>Mar-07</i> |
| 8  | 10630000 | 10650000 | 20 | 1 | 93  | 0.15             | -4.3              | -                                               | 11668855 | 11688853 | -                                     |
| 8  | 11330000 | 11360000 | 30 | 2 | 136 | $0.14 \pm 0.019$ | $-4.54 \pm 0.484$ | <i>SNX7</i>                                     | 12368824 | 12398824 | <i>SNX7</i>                           |
| 8  | 11420000 | 11450000 | 30 | 2 | 137 | $0.16 \pm 0.004$ | $-4.1 \pm 0.102$  | -                                               | 12458826 | 12496487 | -                                     |
| 8  | 12050000 | 12070000 | 20 | 1 | 70  | 0.12             | -5.06             | -                                               | 13103912 | 13123912 | -                                     |
| 8  | 12090000 | 12140000 | 50 | 4 | 167 | $0.15 \pm 0.012$ | $-4.21 \pm 0.305$ | -                                               | 13143915 | 13193915 | -                                     |
| 8  | 16000000 | 16030000 | 30 | 2 | 274 | $0.16 \pm 0.005$ | $-4.12 \pm 0.135$ | -                                               | 17123257 | 17153256 | -                                     |
| 8  | 16050000 | 16070000 | 20 | 1 | 208 | 0.15             | -4.34             | -                                               | 17173256 | 17193255 | -                                     |
| 8  | 28540000 | 28580000 | 40 | 2 | 86  | $0.16 \pm 0.002$ | $-4.09 \pm 0.016$ | <i>TYW3</i>                                     | 29736834 | 29776834 | <i>TYW3</i>                           |
| 9  | 10960000 | 10980000 | 20 | 1 | 138 | 0.13             | -4.84             | <i>PLOD2</i>                                    | 11499478 | 11519475 | <i>PLOD2</i>                          |
| 10 | 5350000  | 5390000  | 40 | 3 | 187 | $0.14 \pm 0.016$ | $-4.47 \pm 0.402$ | <i>APBA2</i>                                    | 5788488  | 5828489  | <i>APBA2</i>                          |
| 11 | 10400000 | 10420000 | 20 | 1 | 255 | 0.15             | -4.2              | <i>KIAA0355</i>                                 | 11054882 | 11074888 | <i>KIAA0355</i>                       |
| 11 | 12350000 | 12390000 | 40 | 3 | 199 | $0.13 \pm 0.032$ | $-4.82 \pm 0.83$  | <i>CDH8</i>                                     | 13046168 | 13102512 | <i>CDH8</i>                           |
| 11 | 12810000 | 12830000 | 20 | 1 | 185 | 0.15             | -4.26             | -                                               | 13522597 | 13542604 | -                                     |
| 11 | 14890000 | 14910000 | 20 | 1 | 222 | 0.15             | -4.32             | -                                               | 15644830 | 15664829 | -                                     |
| 11 | 18720000 | 18750000 | 30 | 2 | 95  | $0.14 \pm 0.008$ | $-4.61 \pm 0.215$ | -                                               | 19516200 | 19546198 | -                                     |
| 12 | 16600000 | 16620000 | 20 | 1 | 138 | 0.15             | -4.38             | <i>PDZRN3</i>                                   | 16647821 | 16667822 | <i>PDZRN3</i>                         |
| 18 | 10910000 | 10940000 | 30 | 2 | 52  | $0.14 \pm 0.022$ | $-4.59 \pm 0.565$ | <i>SLC16A5,</i><br><i>ARMC7, HNI</i>            | 10732550 | 10762550 | <i>SLC16A5,</i><br><i>ARMC7, JPT1</i> |
| 18 | 11080000 | 11100000 | 20 | 1 | 51  | 0.15             | -4.35             | <i>TMEM94</i>                                   | 10902378 | 10922379 | <i>TMEM94</i>                         |

|    |          |          |    |   |     |                  |                   |                                                                            |          |          |                                                                                            |
|----|----------|----------|----|---|-----|------------------|-------------------|----------------------------------------------------------------------------|----------|----------|--------------------------------------------------------------------------------------------|
| 18 | 11120000 | 11140000 | 20 | 1 | 58  | 0.16             | -4.1              | <i>CASKIN2,<br/>MCHR1</i>                                                  | 10942379 | 10962384 | <i>MCHR1,<br/>CASKIN2</i>                                                                  |
| 22 | 230000   | 300000   | 70 | 6 | 133 | $0.13 \pm 0.016$ | $-4.9 \pm 0.403$  | <i>ANTXR1,<br/>GKN2,<br/>BMP10,<br/>ARHGAP25</i>                           | 238113   | 308051   | <i>GKN2,<br/>ARHGAP25,<br/>ANTXR1,<br/>BMP10</i>                                           |
| 22 | 560000   | 580000   | 20 | 1 | 56  | 0.15             | -4.24             | <i>PPP2R2A</i>                                                             | 568106   | 588044   | <i>PPP2R2A</i>                                                                             |
| 22 | 630000   | 650000   | 20 | 1 | 68  | 0.16             | -4.09             | <i>EBF2</i>                                                                | 638042   | 658043   | <i>EBF2</i>                                                                                |
| 22 | 1040000  | 1070000  | 30 | 2 | 87  | $0.13 \pm 0.009$ | $-4.75 \pm 0.227$ | <i>ADAM28</i>                                                              | 1048083  | 1078084  | -                                                                                          |
| 22 | 1110000  | 1140000  | 30 | 2 | 58  | $0.15 \pm 0.006$ | $-4.2 \pm 0.158$  | -                                                                          | 1118082  | 1148094  | -                                                                                          |
| 22 | 1220000  | 1250000  | 30 | 2 | 135 | $0.15 \pm 0.009$ | $-4.19 \pm 0.246$ | <i>LOXL2,<br/>R3HCC1</i>                                                   | 1228020  | 1258019  | <i>LOXL2</i>                                                                               |
| 22 | 1590000  | 1610000  | 20 | 1 | 113 | 0.16             | -4.07             | <i>SLC18A1,<br/>MAK16,<br/>TTI2,<br/>RNF122</i>                            | 1616510  | 1636436  | <i>SLC18A1,<br/>DUSP26,<br/>RNF122, TTI2,<br/>MAK16</i>                                    |
| 23 | 5420000  | 5490000  | 70 | 6 | 88  | $0.14 \pm 0.028$ | $-4.66 \pm 0.723$ | <i>PABPC4,<br/>HEYL,<br/>NT5C1A,<br/>HPCAL4,<br/>TRIT1,<br/>MYCL</i>       | 5481959  | 5551860  | <i>HPCAL4,<br/>TRIT1, MYCL,<br/>SNORA55,NT5C<br/>1A, HEYL</i>                              |
| 26 | 160000   | 190000   | 30 | 2 | 58  | $0.15 \pm 0.012$ | $-4.33 \pm 0.306$ | <i>MAPK13,<br/>BRPF3</i>                                                   | 164475   | 194481   | <i>MAPK13</i>                                                                              |
| 26 | 5230000  | 5250000  | 20 | 1 | 62  | 0.15             | -4.23             | <i>ATP2B4</i>                                                              | 5195938  | 5215915  | <i>ATP2B4</i>                                                                              |
| 26 | 5290000  | 5310000  | 20 | 1 | 62  | 0.15             | -4.4              | -                                                                          | 5255921  | 5275925  | -                                                                                          |
| 27 | 4970000  | 5040000  | 70 | 4 | 58  | $0.14 \pm 0.01$  | $-4.67 \pm 0.262$ | <i>MLX,<br/>PSMC3IP,<br/>FAM134C,<br/>TUBG1,<br/>PLEKHH3,<br/>CNTNAP1,</i> | 5393751  | 5462838  | <i>EZH1, CCR10,<br/>WNK4, Mlx,<br/>VPS25, RAMP2,<br/>CNTNAP1,<br/>RETREG3,<br/>PSMC3IP</i> |

|    |         |         |    |   |    |                  |                   |                                             |         |         |                                            |
|----|---------|---------|----|---|----|------------------|-------------------|---------------------------------------------|---------|---------|--------------------------------------------|
|    |         |         |    |   |    |                  |                   | <i>EZH1,<br/>RAMP2,<br/>WNK4,<br/>CCR10</i> |         |         |                                            |
| 27 | 5070000 | 5110000 | 40 | 3 | 66 | $0.14 \pm 0.015$ | $-4.51 \pm 0.379$ | <i>AARSD1,<br/>RUNDC1,<br/>RPL27, IFI35</i> | 5492836 | 5532835 | <i>G6PC, IFI35,<br/>AARSD1,<br/>RUNDC1</i> |
